# Supplementary material for: Genome-Wide Identification and Tissue-Specific Expression Analysis of UDP-Glycosyltransferases Genes Confirm Their Abundance in Cicer arietinum (Chickpea) Genome
Source: PLoS One. 2014 Oct 7;9(10):e109715. doi: 10.1371/journal.pone.0109715 (PMC4188811; doi:10.1371/journal.pone.0109715)
Supplement: Table S11 — Description of Cicer arietinum EST BLAST hits against the chickpea dbEST in NCBI. (XLS) [file pone.0109715.s019.xls]

## Sheet: EST search
Table S11 Description of Cicer arietinum EST BLAST hits against the chickpea dbEST in NCBI
S.No	Universal Name	Accession	Description	Max score	Total score	Query coverage (%)	E value	Max identinty (%)	Source tissue for EST		Number of ESTs
1	UGT85H3	GR400167.1	ICC4958_CD53_D07 ICC4958 Slow drought stresses root cDNA library Cicer arietinum cDNA clone ICC4958_CD53_D07 5', mRNA sequence	520	520	25	5*10-147	91	Root	Root	21
2	UGT85H4	GR400167.1	ICC4958_CD53_D07 ICC4958 Slow drought stresses root cDNA library Cicer arietinum cDNA clone ICC4958_CD53_D07 5', mRNA sequence	520	520	25	5*10-147	91	Root	Shoot	6
3	UGT73K2	GR406264.1	JG11_CAAC_687TF JG11 Salinity-stressed chickpea root cDNA library Cicer arietinum cDNA clone JG11_CAAC_687TF 5', mRNA sequence	407	407	15	8*10-113	99	Root	Leaf	6
4	UGT71S1	FE669840.1	mh2_0021_A07 Chickpea leave library Cicer arietinum cDNA clone mh2_0021_A07 5', mRNA sequence	783	783	30	0	100	Leaf	Stem	1
5	UGT88E9	GR399168.1	ICC4958_CD107_A02 ICC4958 field drought stressed root cDNA library Cicer arietinum cDNA clone ICC4958_CD107_A02 5', mRNA sequence	710	710	27	0	100	Root
		GR402050.1	ICCV2_CAAD_119TFB ICCV2 Salinity-stressed chickpea root cDNA library Cicer arietinum cDNA clone ICCV2_CAAD_119TFB 5', mRNA sequence	688	688	26	0	99	Root
		GR401482.1	ICCV2_CAAD_119TR ICCV2 Salinity-stressed chickpea root cDNA library Cicer arietinum cDNA clone ICCV2_CAAD_119TR 5', mRNA sequence	688	688	26	0	99	Root
		GR401481.1	ICCV2_CAAD_119TF ICCV2 Salinity-stressed chickpea root cDNA library Cicer arietinum cDNA clone ICCV2_CAAD_119TF 5', mRNA sequence	578	578	22	2*10-164	99	Root
6	UGT85H7	GR400167.1	ICC4958_CD53_D07 ICC4958 Slow drought stresses root cDNA library Cicer arietinum cDNA clone ICC4958_CD53_D07 5', mRNA sequence	614	614	26	3*10-175	95	Root
7	UGT88E7	GR406820.1	JG11_CAAC_E07TF JG11 Salinity-stressed chickpea root cDNA library Cicer arietinum cDNA clone JG11_CAAC_E07TF 5', mRNA sequence	320	320	27	9*10-87	91	Root
8	UGT88E8	GR406820.1	JG11_CAAC_E07TF JG11 Salinity-stressed chickpea root cDNA library Cicer arietinum cDNA clone JG11_CAAC_E07TF 5', mRNA sequence	407	407	16	8*10-113	99	Root
9	UGT72B18	FE672275.1	mh1_0016_A08 Drought-stressed chickpea leave library Cicer arietinum cDNA clone mh1_0016_A08 5', mRNA sequence	964	964	37	0	100	Leaf
		GR406581.1	JG11_CAAC_B08TF JG11 Salinity-stressed chickpea root cDNA library Cicer arietinum cDNA clone JG11_CAAC_B08TF 5', mRNA sequence	890	890	34	0	100	Root
		CV793607.1	DEF0984 Chickpea (ICC3996) post-inoculation EST library Cicer arietinum cDNA 5' similar to flavonol glucosyl transferase, mRNA sequence	654	654	34	0	90	Stem and leaf
		JG292965.1	TSB1_461 Suppression subtracted cDNA library TSB1 of fusarium wilt stressed Cicer arietinum cDNA Cicer arietinum cDNA, mRNA sequence	331	331	12	5*10-90	100	Shoot
10	UGT72AB1	HO066771.1	AS2-1_P6_D05 Chickpea drought stressed cDNA SSH library AS2 Cicer arietinum cDNA, mRNA sequence	268	268	13	5*10-71	90	Shoot
11	UGT71S3	FE670249.1	mh2_0025_H05 Chickpea leave library Cicer arietinum cDNA clone mh2_0025_H05 5', mRNA sequence	547	547	22	4*10-155	99	Leaf
12	UGT73AC1	HS108799.1	mh-2a_0004_A08 Chickpea leave library Cicer arietinum cDNA clone mh-2a_0004_A08 5', mRNA sequence	805	805	31	0	99	Leaf
13	UGT83G3	GR403205.1	ICCV2_CAAF_A80TF ICCV2 Salinity-stressed chickpea root cDNA library Cicer arietinum cDNA clone ICCV2_CAAF_A80TF 5', mRNA sequence	614	614	25	3*10-175	100	Root
		GR404644.1	ICCV2_CAAF_R55TF ICCV2 Salinity-stressed chickpea root cDNA library Cicer arietinum cDNA clone ICCV2_CAAF_R55TF 5', mRNA sequence	309	309	12	2*10-83	100	Root
14	UGT75L8	GR392042.1	CAAB580TF ICC1882 field drought stressed root cDNA library Cicer arietinum cDNA clone CAAB580TF 5', mRNA sequence	1272	1272	50	0	99	Root
		FE672018.1	mh1_0013_C05 Drought-stressed chickpea leave library Cicer arietinum cDNA clone mh1_0013_C05 5', mRNA sequence	1059	1059	41	0	100	Leaf
		GR390934.1	ICC1882_CD19D11 ICC1882 dehydration stressed root cDNA library Cicer arietinum cDNA clone ICC1882_CD19D11 5', mRNA sequence	637	637	25	0	99	Root
15	UGT74K2	GR404104.1	ICCV2_CAAF_L30TF ICCV2 Salinity-stressed chickpea root cDNA library Cicer arietinum cDNA clone ICCV2_CAAF_L30TF 5', mRNA sequence	654	654	26	0	100	Root
		GR403152.1	ICCV2_CAAF_A12TF ICCV2 Salinity-stressed chickpea root cDNA library Cicer arietinum cDNA clone ICCV2_CAAF_A12TF 5', mRNA sequence	612	612	24	1*10-174	100	Root
		GR402336.1	ICCV2_CAAF_085TF ICCV2 Salinity-stressed chickpea root cDNA library Cicer arietinum cDNA clone ICCV2_CAAF_085TF 5', mRNA sequence	482	482	19	1*10-135	99	Root
16	UGT89D5	HO066872.1	AS2-1_P7_D10 Chickpea drought stressed cDNA SSH library AS2 Cicer arietinum cDNA, mRNA sequence	329	368	13	2*10-89	98	Shoot
		HO066868.1	AS2-1_P7_D06 Chickpea drought stressed cDNA SSH library AS2 Cicer arietinum cDNA, mRNA sequence	322	357	13	3*10-87	97	Shoot
17	UGT87H2	GR407308.1	JG11_CAAC_K13TF JG11 Salinity-stressed chickpea root cDNA library Cicer arietinum cDNA clone JG11_CAAC_K13TF 5', mRNA sequence	612	612	24	1*10-174	100	Root
18	UGT79B26	GR408726.1	JG11_CAAD_647TF JG11 Salinity-stressed chickpea root cDNA library Cicer arietinum cDNA clone JG11_CAAD_647TF 5', mRNA sequence	522	522	21	1*10-147	99	Root
		GR397872.1	ICC4958_Field_CAAAP56TF ICC4958 field drought stressed root cDNA library Cicer arietinum cDNA clone ICC4958_Field_CAAAP56TF 5', mRNA sequence	416	416	16	2*10-115	100	Root
19	UGT72AB2	HO066771.1	AS2-1_P6_D05 Chickpea drought stressed cDNA SSH library AS2 Cicer arietinum cDNA, mRNA sequence	340	340	16	1*10-92	95	Shoot
